# Supplementary material for: Digital Health Interventions and Patient Safety in Abdominal Surgery: A Systematic Review and Meta-Analysis
Source: PubMed Central journal article supplement (PMC11053376; doi:10.1001/jamanetworkopen.2024.8555), 2024-04-26
Supplement: jamanetwopen-e248555-s002.pdf [file jamanetwopen-e248555-s002.pdf]

## Data Sharing Statement

Grygorian. Digital Health Interventions and Patient Safety in Abdominal Surgery. *JAMA Netw Open*. Published April 26, 2024. doi:10.1001/jamanetworkopen.2024.8555

### Data

**Data available:** Yes

**Data types:** Data dictionary

**How to access data:** Request from author [Norbert.schmitz@med.Uni-Tuebingen.de](mailto:Norbert.schmitz@med.Uni-Tuebingen.de)

**When available:** With publication

### Supporting Documents

**Document types:** None

### Additional Information

**Who can access the data:** Researchers

**Types of analyses:** Review

**Mechanisms of data availability:** Available upon request
